# Supplementary material
Source: PubMed Central journal article supplement (PMC4645304)
Supplement: JVI.01833-15_zjv023150998so1.pdf [file JVI.01833-15_zjv023150998so1.pdf]

**Table S1.** DNA sequencing statistics and features of the IOC-B141 and IOC-B388 genomes

|                                           | IOC-B141             |             | IOC-B388    |
|-------------------------------------------|----------------------|-------------|-------------|
|                                           | 454                  | Illumina    | Illumina    |
| No. reads                                 | 92,655               | 40,379,611  | 21,213,791  |
| Mapped reads <sup>a</sup>                 | 3,533                | 2,394,619   | 1,129,777   |
| Average read length (nt)                  | 461                  | 100         | 100         |
| Mapped bases <sup>b</sup>                 | 1,892,585            | 239,205,305 | 112,828,128 |
| Initial contig sizes (bp)                 | 49,449               | 170,259     | 173,922     |
|                                           | 31,800               | 9,463       | 5,452       |
|                                           | 30,805               | 533         | 215         |
|                                           | 24,385               | 400         | 419         |
|                                           | 17,439               |             |             |
|                                           | 16,184               |             |             |
|                                           | 1,509                |             |             |
|                                           | 569                  |             |             |
|                                           | 191,805 <sup>c</sup> |             |             |
| Genome Coverage ( $\times$ ) <sup>d</sup> | 1,256                |             | 603.4       |
| Final genome size (bp)                    | 192,017              |             | 186,980     |
| Central genome region (bp)                | 170,071              |             | 173,734     |
| ITR sizes (bp)                            | 10,973               |             | 6,623       |
| ITR repeats size in bp                    | 54 (9.3); 70 (6.5);  |             | 54 (9.3)    |
| (number of repeats)                       | 125 (2.5); 133 (3)   |             | 125 (2.5)   |
| A+T content                               | 66.6%                |             | 66.6%       |

<sup>a</sup> Number of reads mapped to the final genome.

<sup>b</sup> Number of bases mapped to the final genome.

<sup>c</sup> The final 454-derived contig of 191,805 bp was obtained after Sanger sequencing to fill the gaps.

<sup>d</sup> Redundancy was calculated based on the final genome.

**Table S2.** Complete list of ORFs encoded by VACV-IOC-B141, VACV-IOC-B388 and CTGV

| ORF <sup>a</sup> | B141            |                 | B388            |                 | Description or putative function | CTGV <sup>d</sup> Orthologs |                 |                 | VACV-Cop<br>or VACV-WR<br>Ortholog <sup>e</sup> | Ortholog<br>Nt <sup>b</sup> (AA <sup>c</sup> ) |
|------------------|-----------------|-----------------|-----------------|-----------------|----------------------------------|-----------------------------|-----------------|-----------------|-------------------------------------------------|------------------------------------------------|
|                  | Nt <sup>b</sup> | AA <sup>c</sup> | Nt <sup>b</sup> | AA <sup>c</sup> |                                  | ORF <sup>a</sup>            | Nt <sup>b</sup> | AA <sup>c</sup> |                                                 |                                                |
| <b>IOC_001</b>   | <b>255</b>      | <b>84</b>       | -               | -               | hypothetical protein             | -                           | -               | -               | VARV-Gar_1966-<br>G4R<br>HSPV-MNR76-001         | 498 (165)/<br>219 (72)                         |
| <b>IOC_002</b>   | <b>147</b>      | <b>48</b>       | <b>147</b>      | <b>48</b>       | hypothetical protein             | -                           | -               | -               | HSPV-MNR76-001                                  | 219 (72)                                       |
| -                | -               | -               | -               | -               | chemokine-binding protein        | CTGV_001                    | 126             | 41              | Cop C23L/B29R                                   | 735 (244)                                      |
| <b>IOC_003</b>   | <b>681</b>      | <b>226</b>      | 711             | 236             |                                  | <b>CTGV_002</b>             | <b>519</b>      | <b>172</b>      |                                                 |                                                |
| IOC_004          | 192             | 63              | -               | -               | TNF-alpha-receptor-like protein  | CTGV_003                    | 192             | 63              | WR-002                                          | 183 (61)                                       |
| IOC_005          | 105             | 34              | 105             | 34              |                                  | CTGV_004                    | 105             | 34              |                                                 |                                                |
| IOC_006          | 360             | 119             | 342             | 113             | TNF-alpha-receptor-like protein  | -                           | -               | -               | Cop C22L/B28R                                   | 369 (122)                                      |
| IOC_007          | 150             | 49              | 150             | 49              | ankyrin-like protein             | -                           | -               | -               | WR-005                                          | 147 (48)                                       |
| IOC_008          | 201             | 66              | 201             | 66              | ankyrin-like protein             | -                           | -               | -               | Cop C21L/B27R                                   | 342 (113)                                      |
| IOC_009          | 141             | 46              | 141             | 46              |                                  | -                           | -               | -               |                                                 |                                                |
| IOC_010          | 186             | 61              | 186             | 61              | ankyrin-like protein             | -                           | -               | -               | Cop C18L/B24R                                   | 453 (150)                                      |
| IOC_011          | 318             | 105             | 318             | 105             | ankyrin-like protein             | -                           | -               | -               | Cop C17L/B23R                                   | 1161 (386)                                     |
| <b>IOC_012</b>   | 192             | 63              | <b>195</b>      | <b>64</b>       |                                  | -                           | -               | -               |                                                 |                                                |
| IOC_013          | 702             | 233             | 702             | 233             |                                  | CTGV_005                    | 231             | 76              |                                                 |                                                |
| IOC_014          | 531             | 176             | 522             | 173             | predicted Bcl-2 protein          | CTGV_006                    | 453             | 150             | Cop C16L/B22R                                   | 546 (181)                                      |

|                |            |            |            |            |                                                                                                         |                 |            |            |               |                       |
|----------------|------------|------------|------------|------------|---------------------------------------------------------------------------------------------------------|-----------------|------------|------------|---------------|-----------------------|
| <b>IOC_015</b> | <b>123</b> | <b>40</b>  | <b>123</b> | <b>40</b>  | ankyrin-like protein                                                                                    | <b>CTGV_007</b> | <b>123</b> | <b>40</b>  | HSPV201b      | 204 (67)              |
| IOC_016        | 258        | 85         | 258        | 85         | hypothetical protein                                                                                    | -               | -          | -          | Cop C15L/B21R | 276 (91)              |
| IOC_017        | 1062       | 353        | 1065       | 354        | serine protease inhibitor (Serp)-1 (SPI-1)                                                              | CTGV_008        | 1065       | 354        | Cop C12L      | 1062 (353)            |
| <b>IOC_018</b> | <b>423</b> | <b>140</b> | <b>423</b> | <b>140</b> | secreted epidermal growth factor-like (VGF)                                                             | <b>CTGV_009</b> | <b>423</b> | <b>140</b> | Cop C11R      | 429 (142)             |
| IOC_019        | 279        | 92         | 279        | 92         | IL-1 receptor antagonist; DNA-PK binding protein; binds to (PHD)2 protein; involved in hypoxic response | -               | -          | -          | Cop C10L      | 996 (331)             |
| IOC_020        | 573        | 190        | 573        | 190        |                                                                                                         | CTGV_010        | 996        | 331        |               |                       |
| -              | -          | -          | -          | -          | Ubiquitin Ligase/Host defense modulator                                                                 | CTGV_011        | 135        | 44         | WR-011        | 546 (181)             |
| IOC_021        | 252        | 83         | 252        | 83         |                                                                                                         | CTGV_012        | 252        | 83         |               |                       |
| IOC_022        | 189        | 62         | 189        | 62         | zinc finger-like protein/Ubiquitin Ligase/Host defense modulator                                        | CTGV_013        | 189        | 62         | WR-012        | 189 (62)              |
| <b>IOC_023</b> | 363        | 120        | <b>381</b> | <b>126</b> | host defense modulator; interleukin-18-binding protein                                                  | CTGV_014        | 381        | 126        | WR-013        | 381 (126)             |
| IOC_024        | 273        | 90         | 273        | 90         | ankyrin-like protein (77 kDa cowpox host-range)                                                         | -               | -          | -          | WR-014        | 714 (237)             |
| IOC_025        | 525        | 174        | 414        | 137        | ankyrin-like protein (77 kDa cowpox host-range)                                                         | -               | -          | -          | WR-014        | 714 (237)             |
| IOC_026        | 408        | 135        | 408        | 135        | ankyrin-like protein (77 kDa cowpox host-range)                                                         | -               | -          | -          | WR-015        | 414 (137)             |
| IOC_027        | 474        | 157        | 384        | 127        | ankyrin-like protein (77 kDa cowpox host-range)                                                         | -               | -          | -          | WR-016/WR-017 | 234 (77)<br>/216 (71) |

|                |            |           |            |           |                                                                                                           |          |     |     |         |            |
|----------------|------------|-----------|------------|-----------|-----------------------------------------------------------------------------------------------------------|----------|-----|-----|---------|------------|
| IOC_028        | 180        | 59        | 180        | 59        | hypothetical protein                                                                                      | -        | -   | -   | WR-018  | 183 (60)   |
| IOC_029        | 924        | 307       | 924        | 307       | ankyrin-like protein                                                                                      | -        | -   | -   | Cop C9L | 1905 (634) |
| IOC_030        | 153        | 50        | 153        | 50        |                                                                                                           | -        | -   | -   |         |            |
| IOC_031        | -          | -         | 207        | 68        |                                                                                                           | -        | -   | -   |         |            |
| IOC_032        | 684        | 227       | 495        | 164       |                                                                                                           | CTGV_015 | 579 | 192 |         |            |
| IOC_033        | 555        | 184       | 534        | 177       | hypothetical protein                                                                                      | CTGV_016 | 555 | 184 | Cop C8L | 555 (184)  |
| IOC_034        | 453        | 150       | 453        | 150       | host range, virulence factor                                                                              | CTGV_017 | 453 | 150 | Cop C7L | 453 (150)  |
| <b>IOC_035</b> | <b>270</b> | <b>89</b> | <b>261</b> | <b>86</b> | immunomodulatory; predicted                                                                               | -        | -   | -   | Cop C6L | 456 (151)  |
| IOC_036        | 126        | 41        | 126        | 41        | Bcl-2 protein; binds TBK-1<br>adaptor proteins; inhibits IFR-3<br>and IRF-7; inhibits INF-I<br>expression | CTGV_018 | 456 | 151 |         |            |
| IOC_037        | 606        | 201       | 606        | 201       | hypothetical protein                                                                                      | CTGV_019 | 618 | 205 | Cop C5L | 615 (204)  |
| IOC_038        | 189        | 62        | 189        | 62        | putative IL-1 receptor                                                                                    | -        | -   | -   | Cop C4L | 951 (316)  |
| IOC_039        | 231        | 76        | 231        | 76        | antagonist; NFkB inhibitor                                                                                | CTGV_020 | 414 | 137 |         |            |
| IOC_040        | 123        | 40        | 123        | 40        |                                                                                                           | CTGV_021 | 123 | 40  |         |            |
| IOC_041        | 120        | 39        | 120        | 39        |                                                                                                           | CTGV_022 | 120 | 39  |         |            |
| IOC_042        | 393        | 130       | -          | -         | secreted complement C3b/C4b-<br>binding protein; host defense                                             | -        | -   | -   | Cop C3L | 792 (263)  |
| IOC_043        | 189        | 62        | 786        | 261       | modulator                                                                                                 | CTGV_023 | 786 | 261 |         |            |
| IOC_044        | 105        | 34        | 105        | 34        | POZ/BTB kelch domain                                                                                      | -        | -   | -   | Cop C2L | 1539 (512) |
| IOC_045        | 534        | 177       | 534        | 177       | protein; virulence factor                                                                                 | -        | -   | -   |         |            |

|                |            |            |            |            |                                                                                                                         |          |      |     |         |            |
|----------------|------------|------------|------------|------------|-------------------------------------------------------------------------------------------------------------------------|----------|------|-----|---------|------------|
| IOC_046        | 813        | 270        | 813        | 270        |                                                                                                                         | CTGV_024 | 1539 | 512 |         |            |
| IOC_047        | 675        | 224        | 672        | 223        | host defense modulator;<br>predicted Bcl-2 protein                                                                      | CTGV_025 | 675  | 224 | Cop C1L | 675 (224)  |
| IOC_048        | 354        | 117        | 354        | 117        | virulence factor; anti-apoptotic;<br>predicted Bcl-2 protein; NFkB<br>inhibitor; ubiquitylated protein                  | CTGV_026 | 354  | 117 | Cop N1L | 354 (117)  |
| IOC_049        | 513        | 170        | 513        | 170        | alpha-amanitin target; predicted<br>Bcl-2 protein; virulence factor;<br>inhibits IRF3 activity                          | CTGV_027 | 513  | 170 | Cop N2L | 528 (175)  |
| IOC_050        | 198        | 65         | 198        | 65         | ankyrin-like protein                                                                                                    | -        | -    | -   | Cop M1L | 1419 (472) |
| IOC_051        | 645        | 214        | 645        | 214        |                                                                                                                         | -        | -    | -   |         |            |
| IOC_052        | 474        | 157        | 474        | 157        |                                                                                                                         | CTGV_028 | 1413 | 470 |         |            |
| IOC_053        | 663        | 220        | 663        | 220        | NFkB inhibitor                                                                                                          | CTGV_029 | 663  | 220 | Cop M2L | 663 (220)  |
| <b>IOC_054</b> | <b>855</b> | <b>284</b> | <b>855</b> | <b>284</b> | host-range; ankyrin-like protein;<br>NFkB inhibitor; PKR inhibitor;<br>antagonizes IRF-1                                | CTGV_030 | 855  | 284 | Cop K1L | 855 (284)  |
| IOC_055        | 1095       | 364        | 1095       | 364        | serine protease inhibitor-3 (SPI-<br>3); forms the cell fusion<br>inhibitory complex with A56R;<br>host range modulator | CTGV_031 | 1095 | 364 | Cop K2L | 1110 (369) |
| IOC_056        | 183        | 60         | -          | -          | interferon resistance; eIF2<br>alpha-like PKR inhibitor                                                                 | -        | -    | -   | Cop K3L | 267 (88)   |
| IOC_057        | 183        | 60         | 267        | 88         |                                                                                                                         | CTGV_032 | 267  | 88  |         |            |
| IOC_058        | 1275       | 424        | 1275       | 424        | nicking-joining enzyme;<br>phospholipase-D-like protein                                                                 | CTGV_033 | 1275 | 424 | Cop K4L | 1275 (424) |
| IOC_059        | -          | -          | 135        | 44         | putative monoglyceride lipase                                                                                           | CTGV_034 | 111  | 36  | WR-036  | 135 (44)   |

|                |            |            |            |            |                                                                                               |                 |            |            |         |            |
|----------------|------------|------------|------------|------------|-----------------------------------------------------------------------------------------------|-----------------|------------|------------|---------|------------|
| IOC_060        | 516        | 171        | 414        | 137        | putative monoglyceride lipase                                                                 | CTGV_035        | 348        | 115        | Cop K5L | 411 (136)  |
| IOC_061        | 234        | 77         | 234        | 77         | putative monoglyceride lipase                                                                 | CTGV_036        | 195        | 64         | Cop K6L | 246 (81)   |
| <b>IOC_062</b> | <b>450</b> | <b>149</b> | <b>450</b> | <b>149</b> | predicted Bcl-2 protein; NFkB inhibitor; inhibits IRF-3 activation and IFN-I expression       | <b>CTGV_037</b> | <b>444</b> | <b>147</b> | Cop K7R | 450 (149)  |
| IOC_063        | 462        | 153        | 462        | 153        | predicted Bcl-2 protein; inhibits                                                             | -               | -          | -          | Cop F1L | 681 (226)  |
| IOC_064        | 207        | 68         | 204        | 67         | apoptosis by mitochondrial pathway; inhibits inflammasome activation                          | CTGV_038        | 681        | 226        |         |            |
| IOC_065        | 444        | 147        | 444        | 147        | Deoxyuridine 5'-triphosphate nucleotidohydrolase (dUTPase)                                    | CTGV_039        | 444        | 147        | Cop F2L | 444 (147)  |
| IOC_066        | 1443       | 480        | 1443       | 480        | BTB/kelch-like protein protein; innate immune response modifier; virulence factor             | CTGV_040        | 1443       | 480        | Cop F3L | 1443 (480) |
| IOC_067        | 960        | 319        | 960        | 319        | Ribonucleotide reductase small subunit                                                        | CTGV_041        | 960        | 319        | Cop F4L | 960 (319)  |
| IOC_068        | 960        | 319        | 960        | 319        | 36kDa major membrane protein                                                                  | CTGV_042        | 969        | 322        | Cop F5L | 966 (321)  |
| <b>IOC_069</b> | <b>225</b> | <b>74</b>  | <b>225</b> | <b>74</b>  | hypothetical protein                                                                          | <b>CTGV_043</b> | <b>225</b> | <b>74</b>  | Cop F6L | 225 (74)   |
| IOC_070        | 243        | 80         | 243        | 80         | hypothetical protein                                                                          | CTGV_044        | 243        | 80         | Cop F7L | 279 (92)   |
| IOC_071        | 198        | 65         | 198        | 65         | iActA-like proline repeat-containing protein; not required for actin tails formation          | <b>CTGV_045</b> | <b>198</b> | <b>65</b>  | Cop F8L | 198 (65)   |
| IOC_072        | 639        | 212        | 639        | 212        | thiol substrate; S-S bond formation pathway protein; associated with the entry/fusion complex | CTGV_046        | 639        | 212        | Cop F9L | 639 (212)  |

|                |             |            |             |            |                                                                                               |                 |             |            |            |            |
|----------------|-------------|------------|-------------|------------|-----------------------------------------------------------------------------------------------|-----------------|-------------|------------|------------|------------|
| <b>IOC_073</b> | <b>1320</b> | <b>439</b> | <b>1320</b> | <b>439</b> | Serine/threonine kinase 2                                                                     | <b>CTGV_047</b> | <b>1320</b> | <b>439</b> | Cop F10L   | 1320 (439) |
| IOC_074        | 1047        | 348        | 1047        | 348        | RhoA signalling inhibitor, virus release protein; cell motility                               | <b>CTGV_048</b> | <b>1065</b> | <b>354</b> | Cop F11L   | 1065 (354) |
| IOC_075        | 1908        | 635        | 1908        | 635        | IEV formation associated protein; KLC-like protein                                            | CTGV_049        | 1908        | 635        | Cop F12L   | 1908 (635) |
| <b>IOC_076</b> | <b>1119</b> | <b>372</b> | <b>1119</b> | <b>372</b> | palmytilated EV membrane protein                                                              | CTGV_050        | 1119        | 372        | Cop F13L   | 1119 (372) |
| <b>IOC_077</b> | <b>222</b>  | <b>73</b>  | <b>222</b>  | <b>73</b>  | hypothetical protein                                                                          | <b>CTGV_051</b> | <b>222</b>  | <b>73</b>  | Cop F14L   | 222 (73)   |
| IOC_078        | 150         | 49         | 150         | 49         | MV protein; virulence factor; cell adhesion                                                   | CTGV_052        | 150         | 49         | Cop F14.5L | 150 (49)   |
| IOC_079        | 477         | 158        | 477         | 158        | hypothetical protein                                                                          | CTGV_053        | 477         | 158        | Cop F15L   | 477 (158)  |
| IOC_080        | 696         | 231        | 690         | 229        | hypothetical protein                                                                          | CTGV_054        | 696         | 231        | Cop F16L   | 696 (231)  |
| IOC_081        | 306         | 101        | 306         | 101        | VP11; lateral body phosphoprotein                                                             | CTGV_055        | 306         | 101        | Cop F17R   | 306 (101)  |
| IOC_082        | 1440        | 479        | 1440        | 479        | Poly(A) polymerase large subunit (VP55)                                                       | CTGV_056        | 1440        | 479        | Cop E1L    | 1440 (479) |
| IOC_083        | 2214        | 737        | 2214        | 737        | WV Assembly/Interaction with F12                                                              | CTGV_057        | 2193        | 730        | Cop E2L    | 2214 (737) |
| IOC_084        | 573         | 190        | 573         | 190        | dsRNA-binding and Z-DNA-binding protein; interferon resistance; PKR inhibitor; NFkB inhibitor | CTGV_058        | 573         | 190        | Cop E3L    | 573 (190)  |
| IOC_085        | 780         | 259        | 780         | 259        | DNA-dependent RNA polymerase 30 subunit (RPO30)                                               | CTGV_059        | 780         | 259        | Cop E4L    | 780 (259)  |
| IOC_086        | 993         | 330        | 996         | 331        | virosome component protein                                                                    | CTGV_060        | 1029        | 342        | Cop E5R    | 996 (331)  |

|                |             |            |             |            |                                                                                                 |                 |            |            |          |             |
|----------------|-------------|------------|-------------|------------|-------------------------------------------------------------------------------------------------|-----------------|------------|------------|----------|-------------|
| IOC_087        | 1704        | 567        | 1704        | 567        | Core protein/virus morphogenesis                                                                | CTGV_061        | 1704       | 567        | Cop E6R  | 1704 (567)  |
| <b>IOC_088</b> | <b>501</b>  | <b>166</b> | <b>501</b>  | <b>166</b> | EV myristylated soluble protein                                                                 | <b>CTGV_062</b> | <b>501</b> | <b>166</b> | Cop E7R  | 501 (166)   |
| IOC_089        | 822         | 273        | 822         | 273        | virion core protein; substrate for F10 kinase                                                   | CTGV_063        | 822        | 273        | Cop E8R  | 822 (273)   |
| IOC_090        | 3018        | 1005       | 3018        | 1005       | DNA polymerase                                                                                  | CTGV_064        | 3021       | 1006       | Cop E9L  | 3021 (1006) |
| IOC_091        | 288         | 95         | 288         | 95         | Disulfide bond formation pathway protein; ERV1/ALR family of FAD-containing sulfhydryl oxidases | CTGV_065        | 288        | 95         | Cop E10R | 288 (95)    |
| <b>IOC_092</b> | <b>390</b>  | <b>129</b> | <b>390</b>  | <b>129</b> | Virion core protein                                                                             | <b>CTGV_066</b> | <b>390</b> | <b>129</b> | Cop E11L | 390 (129)   |
| IOC_093        | 1992        | 663        | 1992        | 663        | required for sustained ERK1/2 activation                                                        | CTGV_067        | 2001       | 666        | Cop O1L  | 2001 (666)  |
| IOC_094        | 327         | 108        | 327         | 108        | non-essential glutaredoxin 1                                                                    | CTGV_068        | 327        | 108        | Cop O2L  | 327 (108)   |
| IOC_095        | 108         | 35         | 108         | 35         | integral component of virus entry/fusion complex                                                | CTGV_069        | 108        | 35         | Cop O3L  | 108 (35)    |
| IOC_096        | 939         | 312        | 939         | 312        | Telomere-binding protein                                                                        | CTGV_070        | 939        | 312        | Cop I1L  | 939 (312)   |
| IOC_097        | 216         | 71         | 216         | 71         | required for virus entry/fusion                                                                 | CTGV_071        | 222        | 73         | Cop I2L  | 222 (73)    |
| <b>IOC_098</b> | <b>801</b>  | <b>266</b> | <b>801</b>  | <b>266</b> | ssDNA-binding phosphoprotein                                                                    | CTGV_072        | 810        | 269        | Cop I3L  | 810 (269)   |
| IOC_099        | 2316        | 771        | 2316        | 771        | Ribonucleotide reductase large subunit                                                          | CTGV_073        | 2316       | 771        | Cop I4L  | 2316 (771)  |
| IOC_100        | 240         | 79         | 240         | 79         | MV protein VP13                                                                                 | CTGV_074        | 240        | 79         | Cop I5L  | 240 (79)    |
| IOC_101        | 1149        | 382        | 1149        | 382        | Telomere-binding protein                                                                        | CTGV_075        | 1149       | 382        | Cop I6L  | 1149 (382)  |
| <b>IOC_102</b> | <b>1272</b> | <b>423</b> | <b>1272</b> | <b>423</b> | viral core cysteine proteinase;ubiquitin-like                                                   | CTGV_076        | 1272       | 423        | Cop I7L  | 1272 (423)  |



| proteinasase   |            |            |            |            |                                                                                                                               |                 |            |            |           |            |
|----------------|------------|------------|------------|------------|-------------------------------------------------------------------------------------------------------------------------------|-----------------|------------|------------|-----------|------------|
| IOC_103        | 2031       | 676        | 2031       | 676        | DExH-Nucleoside triphosphate phosphohydrolase II (NPH-II); DNA-helicase aided by L4R                                          | CTGV_077        | 2031       | 676        | Cop I8R   | 2031 (676) |
| IOC_104        | 1776       | 591        | 1776       | 591        | insulin metalloproteinase-like                                                                                                | CTGV_078        | 1776       | 591        | Cop G1L   | 1776 (591) |
| IOC_105        | 336        | 111        | 336        | 111        | integral component of the entry/fusion complex                                                                                | CTGV_079        | 336        | 111        | Cop G3L   | 336 (111)  |
| IOC_106        | 663        | 220        | 663        | 220        | late transcription elongation factor                                                                                          | CTGV_080        | 663        | 220        | Cop G2R   | 663 (220)  |
| IOC_107        | 375        | 124        | 375        | 124        | thioredoxin-like; Disulfide oxidoreductase; S-S bond formation pathway protein; lateral body component                        | <b>CTGV_081</b> | <b>375</b> | <b>124</b> | Cop G4L   | 375 (124)  |
| IOC_108        | 1305       | 434        | 1305       | 434        | FEN1-like nuclease; required for homologous recombination, double-stand break repair and the production of full-length genome | CTGV_082        | 1305       | 434        | Cop G5R   | 1305 (434) |
| IOC_109        | 192        | 63         | 192        | 63         | DNA-dependent RNA polymerase 7 subunit (RPO7)                                                                                 | CTGV_083        | 192        | 63         | Cop G5.5R | 192 (63)   |
| <b>IOC_110</b> | <b>498</b> | <b>165</b> | <b>498</b> | <b>165</b> | virulence factor/NIpC/P60 superfamily protein                                                                                 | <b>CTGV_084</b> | <b>498</b> | <b>165</b> | Cop G6R   | 498 (165)  |
| IOC_111        | 1107       | 368        | 1107       | 368        | virion structural phosphoprotein; substrate for F10 kinase; early morphogenesis                                               | CTGV_085        | 1116       | 371        | Cop G7L   | 1116 (371) |
| IOC_112        | 783        | 260        | 783        | 260        | Viral late transcription factor                                                                                               | CTGV_086        | 783        | 260        | Cop G8R   | 783 (260)  |

| VLTF-1         |             |            |             |            |                                                                                                                                                  |          |      |     |         |            |
|----------------|-------------|------------|-------------|------------|--------------------------------------------------------------------------------------------------------------------------------------------------|----------|------|-----|---------|------------|
| <b>IOC_113</b> | <b>1023</b> | <b>340</b> | <b>1023</b> | <b>340</b> | integral component of the virus entry/fusion complex; myristylprotein                                                                            | CTGV_087 | 1023 | 340 | Cop G9R | 1023 (340) |
| IOC_114        | 753         | 250        | 753         | 250        | neutralizing antibody MV membrane protein; S-S bond formation pathway thiol substrate; myristylprotein; associated with the entry/fusion complex | CTGV_088 | 753  | 250 | Cop L1R | 753 (250)  |
| IOC_115        | 258         | 85         | 258         | 85         | required for crescent membrane and immature virion formation; recruits ER-derived membranes; interacts with A30.5L                               | CTGV_089 | 258  | 85  | Cop L2R | 264 (87)   |
| IOC_116        | 1053        | 350        | 1053        | 350        | internal virion protein; required for early transcription                                                                                        | CTGV_090 | 1053 | 350 | Cop L3L | 1053 (350) |
| IOC_117        | 756         | 251        | 756         | 251        | DNA-binding protein; nucleocapsid structural protein                                                                                             | CTGV_091 | 756  | 251 | Cop L4R | 756 (251)  |
| IOC_118        | 387         | 128        | 387         | 128        | integral component of virus entry/fusion complex                                                                                                 | CTGV_092 | 387  | 128 | Cop L5R | 387 (128)  |
| IOC_119        | 462         | 153        | 462         | 153        | virion protein; required for morphogenesis                                                                                                       | CTGV_093 | 462  | 153 | Cop J1R | 462 (153)  |
| IOC_120        | 534         | 177        | 534         | 177        | thymidine kinase                                                                                                                                 | CTGV_094 | 534  | 177 | Cop J2R | 534 (177)  |
| IOC_121        | 1002        | 333        | 1002        | 333        | multifunctional poly-A polymerase subunit VP39/cap methyltransferase                                                                             | CTGV_095 | 1002 | 333 | Cop J3R | 1002 (333) |
| IOC_122        | 558         | 185        | 558         | 185        | DNA-dependent RNA                                                                                                                                | CTGV_096 | 558  | 185 | Cop J4R | 558 (185)  |

|                |            |            |            |            |                                                                                                        |                 |            |            |         |             |
|----------------|------------|------------|------------|------------|--------------------------------------------------------------------------------------------------------|-----------------|------------|------------|---------|-------------|
|                |            |            |            |            | polymerase subunit RPO22                                                                               |                 |            |            |         |             |
| <b>IOC_123</b> | <b>402</b> | <b>133</b> | <b>402</b> | <b>133</b> | integral component of the virus entry/fusion complex                                                   | <b>CTGV_097</b> | <b>402</b> | <b>133</b> | Cop J5L | 402 (133)   |
| IOC_124        | 3861       | 1286       | 3861       | 1286       | DNA-dependent RNA polymerase subunit RPO147                                                            | CTGV_098        | 3861       | 1286       | Cop J6R | 3861 (1286) |
| IOC_125        | 516        | 171        | 516        | 171        | Dual specificity protein phosphatase (tyrosine/serine protein phosphatase)                             | CTGV_099        | 516        | 171        | Cop H1L | 516 (171)   |
| IOC_126        | 570        | 189        | 570        | 189        | integral component of virus entry/fusion complex                                                       | CTGV_100        | 570        | 189        | Cop H2R | 570 (189)   |
| IOC_127        | 975        | 324        | 975        | 324        | MV heparin binding surface protein; involved in MV maturation                                          | CTGV_101        | 975        | 324        | Cop H3L | 975 (324)   |
| IOC_128        | 2388       | 795        | 2388       | 795        | RNA polymerase associated protein RAP94; tightly associated with DNA-dependent RNA polymerase          | CTGV_102        | 2388       | 795        | Cop H4L | 2388 (795)  |
| IOC_129        | 612        | 203        | 612        | 203        | Viral late transcription factor VLTF-4; morphogenesis-related, substrate of B1R kinase                 | CTGV_103        | 612        | 203        | Cop H5R | 612 (203)   |
| IOC_130        | 945        | 314        | 945        | 314        | DNA topoisomerase type IB                                                                              | CTGV_104        | 945        | 314        | Cop H6R | 945 (314)   |
| IOC_131        | 441        | 146        | 441        | 146        | involved in the formation of crescent membrane and immature virions; phosphoinositide-binding activity | CTGV_105        | 441        | 146        | Cop H7R | 441 (146)   |
| IOC_132        | 2535       | 844        | 2535       | 844        | mRNA capping enzyme large subunit; transcription                                                       | CTGV_106        | 2535       | 844        | Cop D1R | 2535 (844)  |

| termination factor VTF |      |     |      |     |                                                                                                             |          |      |     |          |            |
|------------------------|------|-----|------|-----|-------------------------------------------------------------------------------------------------------------|----------|------|-----|----------|------------|
| IOC_133                | 441  | 146 | 441  | 146 | virion core protein; required in early morphogenesis                                                        | CTGV_107 | 441  | 146 | Cop D2L  | 441 (146)  |
| IOC_134                | 702  | 233 | 702  | 233 | virion core protein; required in early morphogenesis                                                        | CTGV_108 | 714  | 237 | Cop D3R  | 714 (237)  |
| IOC_135                | 657  | 218 | 657  | 218 | uracil-DNA glycosylase                                                                                      | CTGV_109 | 657  | 218 | Cop D4R  | 657 (218)  |
| IOC_136                | 2358 | 785 | 2358 | 785 | NTPase; interacts with A20R; essential for DNA replication                                                  | CTGV_110 | 2358 | 785 | Cop D5R  | 2358 (785) |
| IOC_137                | 1914 | 637 | 1914 | 637 | early gene transcription factor VETF 70 kDa small subunit                                                   | CTGV_111 | 1914 | 637 | Cop D6R  | 1914 (637) |
| IOC_138                | 486  | 161 | 486  | 161 | DNA-dependent RNA polymerase subunit RPO18                                                                  | CTGV_112 | 486  | 161 | Cop D7R  | 486 (161)  |
| IOC_139                | 915  | 304 | 915  | 304 | GAG-binding MV membrane protein; binds cell surface chondroitin; may affect viral entry; Carbonic anhydrase | CTGV_113 | 915  | 304 | Cop D8L  | 915 (304)  |
| IOC_140                | 642  | 213 | 642  | 213 | mutT motif/mRNA decapping enzyme; contains mutT-like motif of NTP-phosphohydrolase for DNA repair           | CTGV_114 | 642  | 213 | Cop D9R  | 642 (213)  |
| IOC_141                | 747  | 248 | 747  | 248 | mutT motif/mRNA decapping enzyme; NPH-PPH mRNA levels regulator                                             | CTGV_115 | 747  | 248 | Cop D10R | 747 (248)  |
| IOC_142                | 1896 | 631 | 1896 | 631 | ATPase; nucleoside triphosphate phosphohydrolase-I, NPH-I; transcription elongation, termination, release   | CTGV_116 | 1896 | 631 | Cop D11L | 1896 (631) |

| factor         |            |           |            |           |                                                                                                                                       |                 |            |           |           |            |
|----------------|------------|-----------|------------|-----------|---------------------------------------------------------------------------------------------------------------------------------------|-----------------|------------|-----------|-----------|------------|
| IOC_143        | 864        | 287       | 864        | 287       | mRNA capping enzyme small subunit; transcription termination factor VTF                                                               | CTGV_117        | 864        | 287       | Cop D12L  | 864 (287)  |
| IOC_144        | 1656       | 551       | 1656       | 551       | Virus Assembly - Crescent/IV scaffold protein - rifampicin resistance                                                                 | CTGV_118        | 1656       | 551       | Cop D13L  | 1656 (551) |
| IOC_145        | 453        | 150       | 453        | 150       | late gene transcription factor VLTF-2                                                                                                 | CTGV_119        | 453        | 150       | Cop A1L   | 453 (150)  |
| IOC_146        | 675        | 224       | 675        | 224       | late gene transcription factor VLTF-3                                                                                                 | CTGV_120        | 675        | 224       | Cop A2L   | 675 (224)  |
| <b>IOC_147</b> | <b>231</b> | <b>76</b> | <b>231</b> | <b>76</b> | S-S bond formation pathway protein; thioredoxin-like protein; Together with E10 and G4 comprise a conserved cytoplasmic redox pathway | <b>CTGV_121</b> | <b>231</b> | <b>76</b> | Cop A2.5L | 231 (76)   |
| IOC_148        | 1935       | 644       | 1935       | 644       | major core protein 4b precursor                                                                                                       | CTGV_122        | 1935       | 644       | Cop A3L   | 1935 (644) |
| IOC_149        | 840        | 279       | 822        | 273       | 39 kDa core protein; complexes with core protein p4a/4a                                                                               | CTGV_123        | 816        | 271       | Cop A4L   | 846 (281)  |
| IOC_150        | 495        | 164       | 495        | 164       | DNA-dependent RNA polymerase subunit RPO19                                                                                            | CTGV_124        | 495        | 164       | Cop A5R   | 495 (164)  |
| IOC_151        | 1119       | 372       | 1119       | 372       | virion core protein; required for virus envelope biogenesis                                                                           | CTGV_125        | 1119       | 372       | Cop A6L   | 1119 (372) |
| IOC_152        | 2133       | 710       | 2133       | 710       | early gene transcription factor VETF 82 kDa                                                                                           | CTGV_126        | 2133       | 710       | Cop A7L   | 2133 (710) |
| IOC_153        | 867        | 288       | 867        | 288       | intermediate gene transcription factor VITF-3 32 kDa small                                                                            | CTGV_127        | 867        | 288       | Cop A8R   | 867 (288)  |

| subunit |      |     |      |     |                                                                                                       |          |      |     |            |            |
|---------|------|-----|------|-----|-------------------------------------------------------------------------------------------------------|----------|------|-----|------------|------------|
| IOC_154 | 285  | 94  | 285  | 94  | MV membrane protein; required in early morphogenesis                                                  | CTGV_128 | 333  | 110 | Cop A9L    | 300 (99)   |
| IOC_155 | 2676 | 891 | 2676 | 891 | major core protein 4a precursor; complexes with A4                                                    | CTGV_129 | 2676 | 891 | Cop A10L   | 2676 (891) |
| IOC_156 | 948  | 315 | 948  | 315 | viral membrane biogenesis protein                                                                     | CTGV_130 | 957  | 318 | Cop A11R   | 957 (318)  |
| IOC_157 | 573  | 190 | 573  | 190 | core protein                                                                                          | CTGV_131 | 579  | 192 | Cop A12L   | 579 (192)  |
| IOC_158 | 207  | 68  | 207  | 68  | MV membrane protein; required for virus maturation                                                    | CTGV_132 | 207  | 68  | Cop A13L   | 213 (70)   |
| IOC_159 | 273  | 90  | 273  | 90  | phosphorylated MV membrane protein                                                                    | CTGV_133 | 273  | 90  | Cop A14L   | 273 (90)   |
| IOC_160 | 162  | 53  | 162  | 53  | nonessential hydrophobic IV/MV membrane protein                                                       | CTGV_134 | 162  | 53  | Cop A14.5L | 162 (53)   |
| IOC_161 | 285  | 94  | 285  | 94  | core protein; required for early morphogenesis                                                        | CTGV_135 | 285  | 94  | Cop A15L   | 285 (94)   |
| IOC_162 | 1137 | 378 | 1137 | 378 | MV membrane-anchored protein; integral component of the virus entry/fusion complex                    | CTGV_136 | 1137 | 378 | Cop A16L   | 1137 (378) |
| IOC_163 | 612  | 203 | 612  | 203 | MV membrane protein; undergoes phosphorylation and proteolytic processing; required for morphogenesis | CTGV_137 | 612  | 203 | Cop A17L   | 612 (203)  |
| IOC_164 | 1482 | 493 | 1482 | 493 | DNA helicase; Transcription Elongation Factor                                                         | CTGV_138 | 1482 | 493 | Cop A18R   | 1482 (493) |
| IOC_165 | 234  | 77  | 234  | 77  | zinc finger-like protein; IV                                                                          | CTGV_139 | 234  | 77  | Cop A19L   | 234 (77)   |

| maturation     |             |            |             |             |                                                                                 |          |      |      |          |             |
|----------------|-------------|------------|-------------|-------------|---------------------------------------------------------------------------------|----------|------|------|----------|-------------|
| IOC_166        | 354         | 117        | 354         | 117         | MV membrane protein; integral component of the virus entry/fusion complex       | CTGV_140 | 354  | 117  | Cop A21L | 354 (117)   |
| <b>IOC_167</b> | <b>1281</b> | <b>426</b> | 1281        | 426         | DNA polymerase processivity factor                                              | CTGV_141 | 1281 | 426  | Cop A20R | 1281 (426)  |
| IOC_168        | 531         | 176        | 531         | 176         | holliday junction resolvase palmitylprotein                                     | CTGV_142 | 531  | 176  | Cop A22R | 531 (176)   |
| IOC_169        | 1149        | 382        | 1149        | 382         | intermediate gene transcription factor VITF-3 45kDa large subunit               | CTGV_143 | 1149 | 382  | Cop A23R | 1149 (382)  |
| <b>IOC_170</b> | 3495        | 1164       | <b>3495</b> | <b>1164</b> | DNA-dependent RNA polymerase subunit RPO132                                     | CTGV_144 | 3495 | 1164 | Cop A24R | 3495 (1164) |
| -              | -           | -          | -           | -           | cowpox A-type inclusion protein                                                 | CTGV_145 | 294  | 97   | Cop A25L |             |
| IOC_171        | 180         | 59         | 180         | 59          | cowpox A-type inclusion protein                                                 | CTGV_146 | 195  | 64   | WR-146   | 465 (154)   |
| IOC_172        | 684         | 227        | 684         | 227         | cowpox A-type inclusion protein                                                 | CTGV_147 | 651  | 216  | WR-147   | 684 (227)   |
| <b>IOC_173</b> | <b>2169</b> | <b>722</b> | 2157        | 718         | cowpox A-type inclusion protein                                                 | CTGV_148 | 2178 | 725  | WR-148   | 2178 (725)  |
| IOC_174        | 1503        | 500        | 1503        | 500         | P4c precursor; membrane fusion suppressor; binds to laminin                     | CTGV_149 | 1506 | 501  | Cop A26L | 969 (322)   |
| IOC_175        | 333         | 110        | 333         | 110         | MV surface protein; involved in MV-cell attachment; binds to glycosaminoglycans | CTGV_150 | 333  | 110  | Cop A27L | 333 (110)   |

|         |     |     |     |     |                                                                                          |          |     |     |            |           |
|---------|-----|-----|-----|-----|------------------------------------------------------------------------------------------|----------|-----|-----|------------|-----------|
| IOC_176 | 441 | 146 | 441 | 146 | MV membrane protein; integral component of the virus entry/fusion complex                | CTGV_151 | 441 | 146 | Cop A28L   | 441 (146) |
| IOC_177 | 918 | 305 | 918 | 305 | DNA-dependent RNA polymerase subunit RPO35                                               | CTGV_152 | 918 | 305 | Cop A29L   | 918 (305) |
| IOC_178 | 234 | 77  | 234 | 77  | MV protein; involved in early morphogenesis; F10 kinase substrate                        | CTGV_153 | 234 | 77  | Cop A30L   | 234 (77)  |
| IOC_179 | 129 | 42  | 129 | 42  | hypothetical protein; involved in early morphogenesis; interacts with L2R                | CTGV_154 | 129 | 42  | Cop A30.5L | 129 (42)  |
| IOC_180 | 375 | 124 | 375 | 124 | hypothetical protein                                                                     | CTGV_155 | 375 | 124 | Cop A31R   | 375 (124) |
| IOC_181 | 813 | 270 | 813 | 270 | DNA packaging protein; putative ATPase                                                   | CTGV_156 | 813 | 270 | Cop A32L   | 903 (300) |
| IOC_182 | 549 | 182 | 549 | 182 | EV envelope phosphoglycoprotein; involved in CEV-cell adherence and actin tail formation | CTGV_157 | 549 | 182 | Cop A33R   | 558 (185) |
| IOC_183 | 507 | 168 | 507 | 168 | EV envelope glycoprotein; involved in CEV cell adherence and actin tail formation        | CTGV_158 | 507 | 168 | Cop A34R   | 507 (168) |
| IOC_184 | 531 | 176 | 531 | 176 | MHC-II antigen presentation inhibitor                                                    | CTGV_159 | 531 | 176 | Cop A35R   | 531 (176) |
| IOC_185 | 639 | 212 | 630 | 209 | WV transmembrane phosphoprotein; involved in actin tail formation                        | CTGV_160 | 660 | 219 | Cop A36R   | 666 (221) |
| IOC_186 | 792 | 263 | 792 | 263 | hypothetical protein                                                                     | CTGV_161 | 807 | 268 | Cop A37R   | 792 (263) |



|         |      |     |      |     |                                                                                |          |      |     |                 |            |
|---------|------|-----|------|-----|--------------------------------------------------------------------------------|----------|------|-----|-----------------|------------|
| IOC_187 | 183  | 60  | 183  | 60  | hypothetical protein;<br>uncharacterized protein A37.5                         | CTGV_162 | 195  | 64  | WR-161          | 189 (62)   |
| IOC_188 | 834  | 277 | 834  | 277 | CD47-like putative membrane<br>protein                                         | CTGV_163 | 834  | 277 | Cop A38L        | 834 (277)  |
| IOC_189 | 681  | 226 | 642  | 213 | semaphorin-like protein; host<br>defense<br>modulator                          | CTGV_164 | 1206 | 401 | Cop A39R        | 1212 (403) |
| IOC_190 | 258  | 85  | 258  | 85  |                                                                                | -        | -    | -   |                 |            |
| IOC_191 | 123  | 40  | 123  | 40  |                                                                                | -        | -    | -   |                 |            |
| IOC_192 | 480  | 159 | 507  | 168 | C-type lectin-like type-II<br>membrane protein; host defense<br>modulator      | CTGV_165 | 402  | 159 | Cop A40R        | 507 (168)  |
| IOC_193 | 639  | 212 | 639  | 212 | secreted glycoprotein; host<br>defense modulator; Chemokine<br>binding protein | CTGV_166 | 582  | 219 | Cop A41L        | 660 (219)  |
| IOC_194 | 402  | 133 | 402  | 133 | profilin-like protein; ATI-<br>localized in Ectromelia virus                   | CTGV_167 | 402  | 133 | Cop A42R        | 402 (133)  |
| IOC_195 | 585  | 194 | 570  | 189 | putative type-I membrane<br>glycoprotein                                       | CTGV_168 | 582  | 193 | Cop A43R        | 585 (194)  |
| IOC_196 | 129  | 42  | 129  | 42  | hypothetical protein; similar to<br>vaccinia virus MVA-156R                    | CTGV_169 | 237  | 78  | Cop-270; WR-169 | 237 (78)   |
| IOC_197 | 1041 | 346 | 1041 | 346 | 3-beta-hydroxysteroid<br>dehydrogenase (3beta-HSD);<br>host defense modulator  | CTGV_170 | 1041 | 346 | Cop A44L        | 1041 (346) |
| IOC_198 | 378  | 125 | 378  | 125 | inactive Cu-Zn superoxide<br>dismutase-like                                    | CTGV_171 | 378  | 125 | Cop A45R        | 378 (125)  |
| IOC_199 | 723  | 240 | 723  | 240 | Toll/IL1-receptor-like protein;<br>predicted Bcl-2 protein; NFkB               | CTGV_172 | 723  | 240 | Cop A46R        | 645 (214)  |

| inhibitor |      |     |      |     |                                                                               |          |      |     |          |            |
|-----------|------|-----|------|-----|-------------------------------------------------------------------------------|----------|------|-----|----------|------------|
| IOC_200   | 759  | 252 | 759  | 252 | hypothetical protein;<br>immunoprevalent protein                              | CTGV_173 | 759  | 252 | Cop A47L | 735 (244)  |
| IOC_201   | 615  | 204 | 615  | 204 | thymidylate kinase                                                            | CTGV_174 | 480  | 159 | Cop A48R | 615 (204)  |
| -         | -    | -   | -    | -   | thymidylate kinase                                                            | CTGV_175 | 138  | 45  | Cop A48R | 615 (204)  |
| IOC_202   | 489  | 162 | 489  | 162 | putative phosphotransferase;<br>predicted Bcl-2 protein; NFkB<br>inhibitor    | CTGV_176 | 489  | 162 | Cop A49R | 489 (162)  |
| IOC_203   | 1659 | 552 | 1659 | 552 | DNA ligase                                                                    | CTGV_177 | 1659 | 552 | Cop A50R | 1659 (552) |
| IOC_204   | 210  | 69  | 210  | 69  | hypothetical protein; associates<br>with and                                  | CTGV_178 | 918  | 305 | Cop A51R | 1005 (334) |
| IOC_205   | 540  | 179 | 540  | 179 | stabilizes ubiquitin; colocalizes<br>with and stabilizes microtubules         | -        | -    | -   |          |            |
| IOC_206   | 573  | 190 | 573  | 190 | Toll/IL1-receptor-like protein;<br>predicted Bcl-2 protein; NFkB<br>inhibitor | CTGV_179 | 573  | 190 | Cop A52R | 573 (190)  |
| IOC_207   | 324  | 107 | 324  | 107 | hypothetical protein                                                          | CTGV_180 | 273  | 90  | Cop A54L | 273 (90)   |
| IOC_208   | 303  | 100 | 303  | 100 | secreted TNF-receptor-like<br>protein; CrmC                                   | CTGV_181 | 303  | 100 | Cop A53R | 312 (103)  |
| IOC_209   | 255  | 84  | 255  | 84  | kelch-like protein                                                            | CTGV_182 | 1695 | 564 | Cop A55R | 1695 (564) |
| IOC_210   | 1416 | 471 | 1416 | 471 |                                                                               | -        | -    | -   |          |            |
| IOC_211   | 927  | 308 | 927  | 308 | hemagglutinin; EV glycoprotein                                                | CTGV_183 | 927  | 308 | Cop A56R | 948 (315)  |
| IOC_212   | 171  | 56  | 114  | 37  | guanylate kinase                                                              | CTGV_184 | 114  | 37  | Cop A57R | 456 (151)  |
| IOC_213   | 456  | 151 | 456  | 151 |                                                                               | CTGV_185 | 492  | 163 |          |            |

|         |      |     |      |     |                                                                                                            |                 |            |            |          |            |
|---------|------|-----|------|-----|------------------------------------------------------------------------------------------------------------|-----------------|------------|------------|----------|------------|
| IOC_214 | 903  | 300 | 903  | 300 | serine/threonine protein kinase                                                                            | CTGV_186        | 903        | 300        | Cop B1R  | 903 (300)  |
| IOC_215 | 660  | 219 | 660  | 219 | schlafen-like protein                                                                                      | CTGV_187        | 660        | 219        | Cop B2R  | 660 (219)  |
| IOC_216 | 183  | 60  | 183  | 60  | schlafen-like protein                                                                                      | CTGV_188        | 186        | 60         | Cop B3R  | 375 (124)  |
| IOC_217 | 186  | 61  | 186  | 61  |                                                                                                            | CTGV_189        | 1671       | 61         |          |            |
| IOC_218 | 1677 | 558 | 1677 | 558 | ankyrin-like protein                                                                                       | CTGV_190        | 954        | 556        | Cop B4R  | 1677 (558) |
| IOC_219 | 954  | 317 | 954  | 317 | EV type-I membrane glycoprotein; involved in plaque size                                                   | <b>CTGV_191</b> | <b>522</b> | <b>317</b> | Cop B5R  | 954 (317)  |
| IOC_220 | 522  | 173 | 522  | 173 | ankyrin-like protein                                                                                       | CTGV_192        | 549        | 173        | Cop B6R  | 522 (173)  |
| IOC_221 | 549  | 182 | 549  | 182 | 21 kDa precursor protein; host defense modulator; ER resident                                              | CTGV_193        | 549        | 182        | Cop B7R  | 549 (182)  |
| IOC_222 | 819  | 272 | 819  | 272 | soluble interferon-gamma receptor-like protein; host defense modulator; interferon resistance              | CTGV_194        | 819        | 272        | Cop B8R  | 819 (272)  |
| IOC_223 | 129  | 42  | 234  | 77  | intracellular viral protein                                                                                | CTGV_195        | 186        | 61         | Cop B9R  | 234 (77)   |
| IOC_224 | 501  | 166 | 501  | 166 | kelch-like protein                                                                                         | CTGV_196        | 501        | 166        | Cop B10R | 501 (166)  |
| IOC_225 | 219  | 72  | 219  | 72  | hypothetical protein                                                                                       | -               | -          | -          | Cop B11R | 267 (88)   |
| IOC_226 | 852  | 283 | 852  | 283 | serine/threonine protein kinase                                                                            | CTGV_197        | 852        | 283        | Cop B12R | 852 (283)  |
| IOC_227 | 351  | 116 | 351  | 116 | serine protease inhibitor (Serp)-2 (SPI-2/CrmA); inhibits apoptosis by the extrinsic pathway; inhibits ICE | CTGV_198        | 351        | 116        | Cop B13R | 351 (116)  |
| IOC_228 | 144  | 47  | 144  | 47  | serine protease inhibitor (Serp)-2 (SPI-2/CrmA);                                                           | CTGV_199        | 663        | 220        | Cop B14R | 669 (222)  |
| IOC_229 | 534  | 177 | 534  | 177 | inhibits apoptosis by the                                                                                  | -               | -          | -          |          |            |

| extrinsic pathway; inhibits ICE |            |            |            |           |                                                                                                         |                 |             |            |                |            |
|---------------------------------|------------|------------|------------|-----------|---------------------------------------------------------------------------------------------------------|-----------------|-------------|------------|----------------|------------|
| IOC_230                         | 450        | 149        | 450        | 149       | predicted Bcl-2 protein; NFkB inhibitor; host immune response modulator                                 | CTGV_200        | 450         | 149        | Cop B15R       | 450 (149)  |
| IOC_231                         | 981        | 326        | 981        | 326       | IL-1-beta-inhibitor; host defense modulator                                                             | CTGV_201        | 981         | 326        | Cop B16R       | 981 (326)  |
| IOC_232                         | 1023       | 340        | 1023       | 340       | hypothetical protein                                                                                    | CTGV_202        | 1023        | 340        | Cop B17L       | 1023 (340) |
| IOC_233                         | 1725       | 574        | 1725       | 574       | ankyrin-like protein                                                                                    | CTGV_203        | 1725        | 574        | Cop B18R       | 1725 (574) |
| IOC_234                         | 1062       | 353        | 1062       | 353       | IFN-alpha/beta-receptor-like secreted glycoprotein                                                      | <b>CTGV_204</b> | <b>1068</b> | <b>355</b> | Cop B19R       | 1062 (353) |
| IOC_235                         | 162        | 53         | -          | -         | ankyrin-like protein                                                                                    | CTGV_205        | 162         | 53         | Cop B20R       | 384 (127)  |
| -                               | -          | -          | -          | -         | Ubiquitin Ligase/Host defense modulator                                                                 | CTGV_206        | 135         | 44         | WR-011         | 546 (181)  |
| IOC_236                         | 573        | 190        | -          | -         | IL-1 Receptor antagonist; DNA-PK binding protein; binds to (PHD)2 protein; involved in hypoxic response | CTGV_207        | 996         | 331        | Cop C10L       | 996 (331)  |
| IOC_237                         | 279        | 92         | -          | -         |                                                                                                         | -               | -           | -          |                |            |
| <b>IOC_238</b>                  | <b>423</b> | <b>140</b> | -          | -         | secreted epidermal growth factor-like (VGF)                                                             | CTGV_208        | 423         | 140        | Cop C11R       | 429 (142)  |
| IOC_239                         | 1062       | 353        | -          | -         | serine protease inhibitor (Serpin)-1 (SPI-1)                                                            | CTGV_209        | 1065        | 354        | Cop C12L       | 1062 (353) |
| IOC_240                         | 258        | 85         | 258        | 85        | hypothetical protein                                                                                    | -               | -           | -          | Cop B21R /C15L | 276 (91)   |
| <b>IOC_241</b>                  | <b>123</b> | <b>40</b>  | <b>123</b> | <b>40</b> | ankyrin-like protein                                                                                    | CTGV_210        | 123         | 40         | HSPV201b       | 204 (67)   |
| IOC_242                         | 531        | 176        | 522        | 173       | predicted Bcl-2 protein                                                                                 | CTGV_211        | 453         | 150        | Cop B22R/C16L  | 546 (181)  |
| IOC_243                         | 702        | 233        | 702        | 233       | ankyrin-like protein                                                                                    | CTGV_212        | 231         | 76         | Cop B23R/C17L  | 1161 (386) |

|                |            |            |            |           |                                 |                 |            |            |                                          |                        |
|----------------|------------|------------|------------|-----------|---------------------------------|-----------------|------------|------------|------------------------------------------|------------------------|
| <b>IOC_244</b> | 192        | 63         | <b>195</b> | <b>64</b> |                                 | -               | -          | -          |                                          |                        |
| IOC_245        | 318        | 105        | 318        | 105       |                                 | -               | -          | -          |                                          |                        |
| IOC_246        | 186        | 61         | 186        | 61        | ankyrin-like protein            | -               | -          | -          | Cop B24R/C18L                            | 453 (150)              |
| IOC_247        | 141        | 46         | 141        | 46        | ankyrin-like protein            | -               | -          | -          | Cop B27R/C21L                            | 342 (113)              |
| IOC_248        | 201        | 66         | 201        | 66        |                                 | -               | -          | -          |                                          |                        |
| IOC_249        | 150        | 49         | 150        | 49        | ankyrin-like protein            | -               | -          | -          | WR-005                                   | 147 (48)               |
| IOC_250        | 360        | 119        | 342        | 113       | TNF-alpha-receptor-like protein | -               | -          | -          | Cop B28R/C22L                            | 369 (122)              |
| IOC_251        | 105        | 34         | 105        | 34        | TNF-alpha-receptor-like protein | <b>CTGV_213</b> | <b>105</b> | <b>34</b>  | WR-002/217                               | 186 (61)               |
| IOC_252        | 192        | 63         |            |           |                                 | CTGV_214        | 192        | 63         |                                          |                        |
| <b>IOC_253</b> | <b>681</b> | <b>226</b> | 711        | 236       | chemokine-binding protein       | <b>CTGV_215</b> | <b>519</b> | <b>172</b> | Cop B29R/C23L                            | 735 (244)              |
|                |            |            |            |           |                                 | CTGV_216        | 126        | 41         |                                          |                        |
| <b>IOC_254</b> | <b>147</b> | <b>48</b>  | <b>147</b> | <b>48</b> | hypothetical protein            | -               | -          | -          | HSPV-MNR76-001                           | 219 (72)               |
| <b>IOC_255</b> | <b>255</b> | <b>84</b>  | -          | -         | hypothetical protein            |                 |            |            | VARV-Gar_1966-<br>G4R HSPV-MNR76-<br>001 | 498 (165)/<br>219 (72) |

<sup>a</sup> ORFs in boldface had the highest identity score with HSPV (or the second highest score when the first highest score was Serro 2 virus).

<sup>b</sup> length in nucleotide number.

<sup>c</sup> length in amino acid number.

<sup>d</sup> CTGV = Cantagalo virus.

<sup>e</sup> In the absence of an ortholog in VACV-Cop, an ortholog in VACV-WR was indicated if available or the best matching ORF is indicated. VARV= variola virus; HSPV= horsepox virus.

A

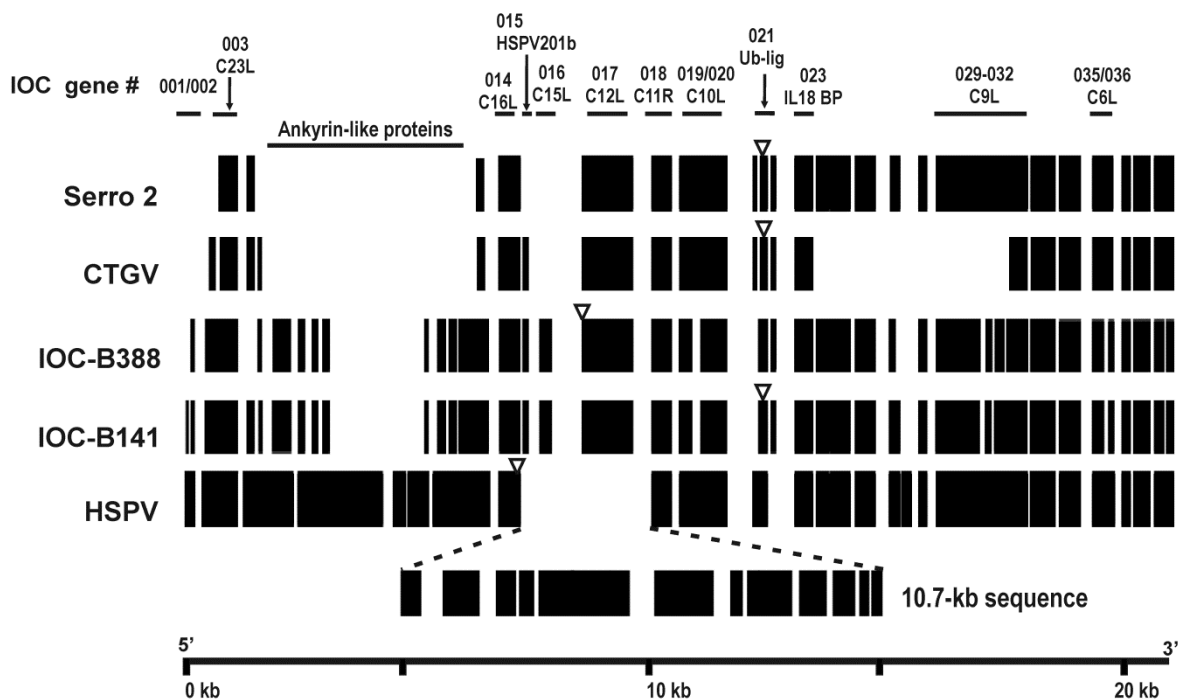

B

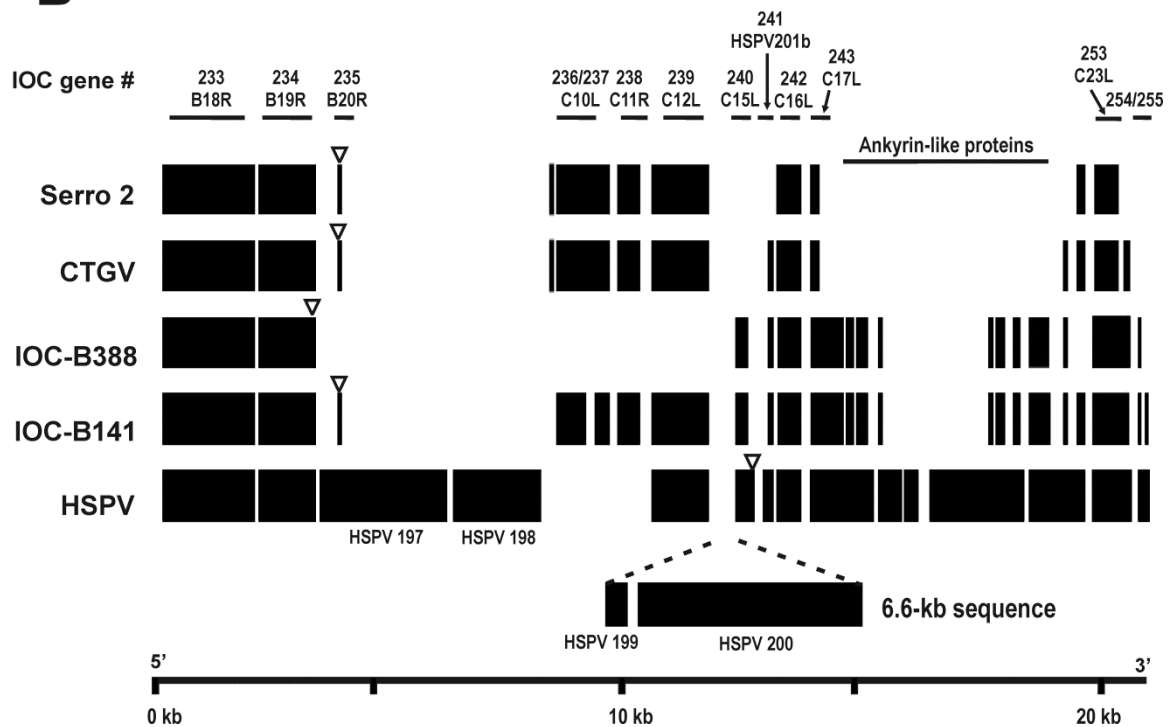

**FIG S1.** Blast atlas of the genome terminal regions of B141, B388, CTGV, Serro 2 virus, and HSPV. A blast atlas of the 5' (A) or 3'(B) genome ends was created using GView Server based on a synthetic reference genome that contained all possible genes present in the ends of the genomes of B141, B388, CTGV, Serro 2 virus, and HSPV. The IOC genes most relevant to the analysis are indicated on the top of each blast atlas. Orthologs of VACV-Cop, VACV-WR, or HSPV are also indicated below the IOC gene. Open triangles indicate the ITR junction sites: 5' ITR on the left (A) and 3' ITR on the right (B) of the open triangles.
